## **Depression stigma effects on help-seeking attitudes in college students: Baseline results of a randomized controlled trial**

### **Short running title: Mental health stigma in college students**

Virgínia da Conceição<sup>1</sup>, Inês Rothes<sup>2,3</sup>, Ricardo Gusmão<sup>4,5</sup>

<sup>1</sup> Institute of Public Health of the University of Porto, Portugal

<sup>2</sup> Faculty of Psychology and Education Science, University of Porto, Portugal

<sup>3</sup> Center for Psychology at University of Porto, Portugal

<sup>4</sup> EPIUnit - Institute of Public Health, University of Porto, Portugal

<sup>5</sup> Department of Public Health and Forensic Sciences, and Medical Education, Faculty of Medicine, University of Porto, Portugal

### **Abstract**

*Background:* College years represent a critical phase in young people's lives and increased risk of mental illness. Depression stigma has been considered a significant barrier to treatment, rehabilitation, and help-seeking attitudes of people diagnosed with depression. In this study, we aimed to understand the effects of age, gender, previous health care use, and PHQ-4 scores on depression stigma, and analyze the effects of depression stigma on help-seeking attitudes.

*Methods:* A total of 969 students with a mean age of 18.87 (SD=1.49) ranging between 16 and 25 were included in this study and completed the Depression Stigma Scale (DSS), the Attitude Toward Seeking Professional Psychological Help, the General help-seeking questionnaire, the PHQ-4 questionnaire, and a socio-demographic questionnaire. Data were analyzed using SPSS 24.0.

*Results:* Both being a woman and previously experienced mental healthcare services had a positive effect on stigma and help-seeking attitudes. Higher personal stigma weakens help-seeking attitudes. PHQ-4 scores influence personal depression stigma and perceived stigma; however, we detected no direct effect from PHQ-4 on help-seeking attitudes.

**Conclusions:** Personal depression stigma has an essential effect on help-seeking attitudes. The promotion of literacy may decrease personal depression stigma and increase professional help-seeking intentions.

**Keywords:** Depression, social stigma, help-seeking behaviour, students

## Introduction

Mental and behavioural disorders are estimated to account for 12% of the global burden of disease (World Health Organization, 2001). The number of people diagnosed with depressive disorders amounts to 4.4% of the world population, and depression ranks as the first contributor to non-fatal health loss with 7.5% of all Years Lived with Disability (YLD) (World Health Organization, 2017).

The college years are a critical developmental phase that typically coincides with the emerging adulthood (Arnett, 2000), growingly conceptualized as 'late adolescence' (Sawyer, Azzopardi, Wickremarathne, & Patton, 2018; Twenge & Park, 2019). This period, between 18 and 25 years old, is a distinct stage in life during which people go through several changes such as moving away from home, making decisions about their professional future, and social networking restructuration. Subjectively, most young people do not see themselves as teenagers or adults, and fluctuations occur at the identity level, including sex-affective relationships, work prospects, and worldview exploration (Arnett, 2000).

Entering a college or university mainly presents a high-risk transition due to several situational changes and increases in life stressors, including academic and interpersonal difficulties (Uehara, Takeuchi, Kubota, Oshima, & Ishikawa, 2010).

Depressive disorders frequently affect college and university students (Hysenbegasi, Hass, & Rowland, 2005). The WHO Mental Health surveys reported a 12-month prevalence of major depression for 18.5% of first-year college students, which represents the higher prevalence of all mental health disorders (Auerbach et al., 2018). Depressive disorders are also more prevalent among university students than non-students for the same age group (Auerbach et al., 2018; Ibrahim, Kelly, Adams, & Glazebrook, 2013).

Mental illness has a crucial negative impact on academic performance, increasing the odds of school attrition (Alonso et al., 2018; Auerbach et al., 2016).

Stigma is a significant issue for people living with depression, facing social and institutional stigmatizing responses similar to those experienced by people with psychosis or chronic mental illness (Corrigan, 2006). Mental illness stigma is also

widely associated with constraints in mental healthcare access (Knaak, Mantler, & Szeto, 2017).

Thus, reducing the stigma affecting people who have a mental illness is one of the main objectives of the Mental Health Action Plan 2013–2020 of the World Health Organization (World Health Organization, 2013).

The identification of stigma predictors could have a significant impact on addressing stigma reduction (K. M. Griffiths, Christensen, & Jorm, 2008). An association between gender and personal stigma has been reported, with higher scores among men than women (Calear, Griffiths, & Christensen, 2011).

In the last decade, there has been a growing interest in the mental health stigma interventions and research in Portugal. Schooling, age, and previous contact with mental illness have been considered crucial mental health stigma predictors (Oliveira & Azevedo, 2014).

There has been a broad agreement about the importance of studying mental health stigma in health students by health professionals acting as health literacy promoters (Xavier, Klut, Neto, Ponte, & Melo, 2013). In the past years, research on stigma in health students in Portugal has demonstrated the need for stigma reduction intervention in this group of students (Querido, Tomás, & Carvalho, 2016). Anti-stigma specific education (Gil, 2015; Telles-Correia, Marques, Gramaça, & Sampaio, 2015), clerkship (Petkari, Masedo Gutierrez, Xavier, & Moreno Kustner, 2018) and familiarity (McNair, Hight, Hickie, & Davenport, 2002) may be valuable tools to reduce stigma in health students.

Despite the increasing number of studies addressing mental health stigma and help-seeking, most of the studies do not focus depression, thus not addressing depression specific stigmatizing beliefs (Eisenberg, Downs, Golberstein, & Zivin, 2009; Jennings et al., 2015; Pedersen & Paves, 2014; Schnyder, Panczak, Groth, & Schultze-Lutter, 2017). Moreover, even if many studies address participants' depressive symptomatology, in many instances the analysis will reflect that. Sampling in young adults is also a common problem found in the literature because participants are commonly either health students or professionals (Wei, McGrath, Hayden, & Kutcher, 2015).

Lastly, the effects of previous mental health care utilization have not been well explored and can be useful in the study of the relationship between stigma and help-seeking (Eisenberg et al., 2009).

### **Aims**

To understand the effects of age, gender, previous health care use, and PHQ-4 scores on depression stigma, as well as to analyze the effects of depression stigma on help-seeking attitudes.

### **Methods**

This study is part of a more extensive longitudinal research on university students' mental health, including an experimental single-blind randomized control trial registered (RCT) (ISRCTN970936).

#### *Participants*

Using the SurveyMonkey platform, in February 2019, we contacted all 4493 first-year students from all 14 schools of the University of Porto through institutional email and invited them to participate in the study. A reminder email was sent a week after the first email.

#### *Measures*

We asked participants to answer a socio-demographic questionnaire assessing gender, age, place of birth, university course, the Attitudes Toward Seeking Professional Help (ATSPH) (Fischer & Turner, 1970), General help-seeking questionnaire (Wilson, Deane, Ciarrochi, & Rickwood, 2005), the Portuguese version of The Patient Health Questionnaire-4 (PHQ-4) (Khubchandani, Brey, Kotecki, Kleinfelder, & Anderson, 2016; Löwe et al., 2010), and the Depression Stigma Scale (DSS) (Kathleen M Griffiths, Christensen, Jorm, Evans, & Groves, 2004).

The ATSPH is a ten four-point Likert scale, with scores varying from 0 to 30, with higher scores meaning better help-seeking attitudes. The general help-seeking questionnaire is a nine seven-item Likert scale with various categories of help-seeking forms, and an item for any form of help. Its total score varies from 8 to 56, and the higher the score, the better the help-seeking intentions. ATSPH is the most used scale in

mental health help-seeking attitudes, showing excellent psychometric properties in its original form. Both ATSPH and the general help-seeking questionnaire were previously translated and adapted to the Portuguese population in the context of the OSPI program - Optimizing suicide prevention programs and their implementation in Europe, within the application in Portugal (Hegerl et al., 2009; Kohls et al., 2017).

PHQ-4 is a 4-item questionnaire with two items measuring depressive symptoms and two items for anxiety symptoms. Its score varies from 0 to 12; scores 0–5 represent no symptomatology, 5–8 light symptomatology, and 9–12 severe symptomatology.

DSS is an 18 five-point Likert scale, with the first nine items measuring personal stigma (one's own beliefs about depression) and the last nine items measuring perceived stigma (one's beliefs about the attitudes of others). We converted the total score of both scales as a percentage, and the higher the percentage, the higher the stigma. The scale has been translated and validated to the Portuguese population using the OSPI program data (Conceição et al., 2020).

#### *Data analysis*

We performed the analysis using SPSS 24 and described data as counts and proportions for categorical variables. We calculated the mean and standard deviation for normally distributed continuous variables and performed T-tests to study differences between the gender and PHQ-4 groups. We used Pearson correlation for continuous variables and Spearman correlations for categorical variables. We executed linear regressions to analyze the relationship between both DSS subscales and ATSPH, gender, age, and previous contact with mental illness. Since all answers were mandatory to submit the questionnaire, we did not expect to find any missing data.

#### *Ethical considerations*

The Institute of Public Health of the University of Porto ethics committee approved the research on the 26/12/2018 with ID reference CE18096.

## **Results**

### *Participants*

From the 4493 students invited to participate in this study, a total of 1046 (23.3%) accepted to participate. Respondents came from all 14 schools: 224 from Engineering

(22.6% of the 993 students invited), 179 from Humanities (23.6% of the 760 invited), 116 from Sciences (16.6% of the 698 invited), 86 from Biomedical Sciences (22.3% of the 386 invited), 82 from Economics (54.3% of the 151 invited), 81 from Law (33.1% of the 245 invited), 71 from Psychology and Educational Sciences (34.1% of the 208 invited), 53 from Arts (32.5% of the 163 invited), 49 from Pharmacy (26.5% of the 185 invited), 40 from Medicine (16.9% of the 236 invited), 27 from Nutrition (33.8% of the 80 students invited), 17 from Architecture (9.4% of the 139 invited), 13 from Sports (7.6% of the 171 invited), and 8 from Dental Medicine (10.3% of the 78 invited).

To work with a sample within the late adolescence age limits, we excluded respondents aged 26 years and older, resulting in 969 participants.

About two-thirds of the students were women (64.6%, 626), and 35.4% (343) were men, with a mean age of 18.87 (SD=1.49) ranging between 16 and 25. Approximately 43.9% of the students were away from home, and most of those (46.1%) were living with roommates.

Most of the participants had never previously sought mental health help care (59.6%), and 35.4% had a family member with a mental illness diagnosis. Of those who had previously sought mental health care, anxiety was the main reason (46.4%), followed by depression (25%).

In the PHQ-4, participants showed a mean of 5.65 (SD=3.35), and most of the participants had absent symptomatology (51.8% with scores 0–5). However, 25.5% showed light symptomatology (scores 6–8) and 22.7% severe symptomatology (scores 9–12). Only 47.3% of the participants with severe symptomatology had previously sought professional help.

### *Personal depression stigma*

As shown in Table 1, participants who had never sought professional help (Group A) previously showed means of personal depression stigma statistically higher than those who had used mental health services (Group B). However, these differences were not significant among the men group. Notably, the means of both group A and B women were statistically lower than the means of any of the men groups.

When comparing depression personal stigma means according to the PHQ-4 score, we observed statistical differences between participants with no symptomatology and light symptomatology. This second group presented higher personal depression stigma means. Participants with light symptomatology also presented significantly higher means than those with severe symptomatology. However, we obtained no significant differences between the "no symptomatology" and the "severe symptomatology" groups. These differences were only observable within participants who had previously sought help.

However, differences between PHQ-4 scores according to previous access to mental health care were significant in the group with no symptoms and the group with severe symptomatology. Nonetheless, we observed no significant differences in the light symptomatology group.

As for age, we did not obtain any statistically significant Pearson correlation.

Participants with a family member with mental illness diagnosis had a mean personal stigma score of 22.32 (SD=11.26), a significantly lower result ( $t_{(966)}=-2.24$ ,  $p<0.05$ ) than those with no family member with mental illness ( $M=24.17$ ,  $SD=12.78$ ).

Both gender and previous experience with mental health professionals had a significant effect on personal depression stigma, unlike having a family member with mental illness. PHQ-4 scores are a significant predictor only for those with moderate symptoms compared with those with severe symptomatology (Table 2).

### *Perceived depression stigma*

Gender and previous use of mental health services group differences were statistically significant. In contrast, women showed higher means of a depression-perceived stigma than men (Table 3), although the significance of the mean differences disappeared when distributing these subpopulations by previous experiences with mental health services.

Comparing depression-perceived stigma means according to the PHQ-4 score, we observed statistical differences between participants without symptomatology and participants with severe symptomatology. However, these differences disappeared in the comparison according to the previous mental healthcare usage.



We obtained no statistically significant Pearson correlation for age.

We obtained non-significant ( $t_{(968)}=1.77$ ,  $p=0.08$ ) lower scores of perceived stigma in participants with no family member with mental illness ( $M=60.91$ ,  $SD=17.31$ ) compared with those with a family member bearing a mental disorder diagnosis ( $M=63.01$ ,  $SD=18.49$ ).

As can be observed in Table 4, gender and PHQ-4 scores are significant predictors of depression-perceived stigma, with lower scores with less stigma. The difference due to the access to mental healthcare lost its significance as a predictor when we introduced PHQ-4 scores in the model.

#### *Help-seeking attitudes and intentions*

Help-seeking attitudes presented a mean of 18.62 ( $SD=4.76$ ). Women showed significantly higher means than men. Those who have previously sought help present better help-seeking attitudes as well as participants with family members with mental illness. We did not spot any significant differences when controlling for PHQ-4 scores (Table 5).

Help-seeking attitudes had significant, yet weak, correlations with gender ( $r_s=0.18$ ,  $p<0.001$ ) and previous contact with mental healthcare services ( $r_s=0.26$ ,  $p<0.001$ ). The correlation between gender and help-seeking attitudes was remarkably similar within every previous experience with depression group:  $r=-0.39$ ,  $p<0.001$  in the group that had previously used mental healthcare services, and  $r=-0.36$ ,  $p<0.001$  in the group that did not.

Personal depression stigma showed a moderate correlation with help-seeking attitudes ( $r=-0.42$ ,  $p<0.001$ ). The perceived stigma showed a weaker Pearson correlation with help-seeking attitudes ( $r=0.10$ ,  $p<0.001$ ), and this correlation was only significant in the group that had not previously sought help ( $r=0.14$ ,  $p<0.001$ ).

There was no significant correlation between PHQ-4 scores and help-seeking attitudes ( $r_s=-0.01$ ,  $p=0.85$ ).

Participants showed better help-seeking intentions toward their partner ( $M=5.49$ ,  $SD=1.58$ ) than any other category type of help. Seeking help from a friend obtained a

mean of 4.63 (SD=1.77), from parents 4.83 (SD=1.95), another family member 3.05 (SD=1.84), mental health professional 4.95 (SD=1.72), support line 2.65 (SD=1.62), GP 3.03 (SD=1.84), minister or religious leader 1.59 (SD=1.23), and no one 3.01 (SD=1.86), resulting in a total mean of help-seeking intentions of 30.22 (SD=7.73). Personal depression stigma presented a significant correlation with help-seeking intentions ( $r=-0.16$ ,  $p<0.001$ ) and perceived stigma did not ( $r=0.06$ ,  $p=0.08$ ).

## Discussion

Contact with students occurred through institutional email, which may not be accessed very frequently in the case of first-year students. Thus, the response rate was lower than the mean in similar studies in the general population (Burgard, Kasten, & Bosnjak, 2019). Another explanation may be the recent increase in online surveys. However, we found a comparable response rate for each school, except for Economics, which presented a much higher response rate than the mean, and Sports and Architecture with a response rate lower than 10%.

The gender distribution is not very different from the population; in the school year of 2018-2019, University of Porto's records show that 59% of the students were women and 41% men.

Both gender, previous health care use and PHQ-4 scores have a significant effect on depression stigma. Depression stigma presented a significant effect on help-seeking attitudes, even though personal and perceived stigma did not have the same effect direction.

Contrary to previous studies, we found no significant correlation between age and stigma. This result may be because 84.2% of our sample were between 17 and 20 years old, a range that may be too narrow to uncover any potential effect due to age.

Most of the participants with severe depression or anxiety symptoms did not previously seek help. Most of the participants who had previously accessed mental healthcare services pointed anxiety as the main reason, perhaps due to the common misconception that anxious symptomatology is due to an anxiety problem even when it comes from a depressive disorder. This result puts in evidence the importance of mental healthcare promotion among college students.

As expected, (Boerema et al., 2016; Calear et al., 2011; K. M. Griffiths et al., 2008), personal stigma showed significantly lower means than perceived stigma, and women showed lower levels of personal stigma and higher levels of perceived stigma.

Previous mental health care use had a significant effect in both personal and perceived depression stigma; however, when analyzing the effects within each gender, it only showed to be significant for women in the personal stigma. This result agrees with previous studies, where the effects of the previous contact with depression are more evident for personal stigma than for perceived stigma (Busby Grant, Bruce, & Batterham, 2016; K. M. Griffiths et al., 2008). In fact, for perceived stigma, the difference becomes insignificant when analyzing the results by gender. More research may be needed to understand better the different effects of mental healthcare use in men and women on depression stigma.

Depressive symptoms have a mitigating effect on personal stigma for those who have previously sought help, which may be due to the personal stigma reduction effects of mental health interventions. It also reinforces the importance of stigma reduction interventions to promote help-seeking behaviours.

Participants with a family member with mental illness, and thus having indirect experience with mental illness, showed lower personal depression stigma means; however, its effect on personal stigma was not significant.

Participants with lighter symptoms showed more personal stigma and lower perceived stigma than those with severe symptomatology, which could be the result of a process of self-stigmatization and self-denial of a possible need for help, especially in the case of personal stigma. This particularity may be an essential element to consider when addressing personal stigma.

Gulliver et al. (Gulliver, Griffiths, & Christensen, 2010; Thornicroft et al., 2017) demonstrated personal depression stigma to have a more substantial correlation with help-seeking attitudes than gender or previous contact with mental healthcare services, confirming the importance of stigma interventions in the promotion of help-seeking behaviour. Personal depression stigma harmed help-seeking attitudes, whereas perceived stigma had the opposite effect.

Help-seeking intentions also proved to correlate significantly with personal stigma, with a higher personal stigma score associated with lower help-seeking attitudes scores. Moreover, college students showed better intentions of seeking help from their partners than from a mental health professional or general practitioner. The intentions of seeking help from a support line were considerably low. This finding raises some concern because, due to the current pandemic situation, support lines are especially important forms of help-seeking.

One of the main limitations of this study is the representativeness of the sample since the high rate of previous mental healthcare service usage, and the distributions of the PHQ-4 scores are suggestive of some degree of selection bias. The second limitation is the lack of data on essential elements of stigma, namely the time and duration of mental health access care. Further studies should take these elements into account to better understand the effects of previous mental healthcare usage on stigma and help-seeking attitudes.

Despite the possible and inevitable sample bias in online studies, our sample compares well to the University of Porto population, both in distribution by school as distribution by gender, strengthening the generalizability of the results.

## **Conclusions**

More work is needed in promoting and offering mental health care to college students, thus increasing the probability of successful early intervention in depression and anxiety disorders.

College women present lower personal stigma and higher perceived stigma than college men which accounts for the need to reach male individuals with specific outreach programs and messages. Furthermore, as most participants are more likely to seek informal help than professional help, mental health literacy promotion and education, mainly on treatability and treatment, could increase the intentions of seeking professional health.

These are principles for action valid for Portuguese campuses and college students but eventually applicable in many other countries.

## Bibliographic references

- Alonso, J., Mortier, P., Auerbach, R. P., Bruffaerts, R., Vilagut, G., Cuijpers, P.,... Collaborators, W. W.-I. (2018). Severe role impairment associated with mental disorders: Results of the WHO World Mental Health Surveys International College Student Project. *Depress Anxiety*, 35(9), 802-814. doi:10.1002/da.22778
- Arnett, J. J. (2000). Emerging adulthood: A theory of development from the late teens through the twenties. *American Psychologist*, 55(5), 469-480. doi:10.1037/0003-066x.55.5.469
- Auerbach, R. P., Alonso, J., Axinn, W. G., Cuijpers, P., Ebert, D. D., Green, J. G.,... Bruffaerts, R. (2016). Mental disorders among college students in the World Health Organization World Mental Health Surveys. *Psychol Med*, 46(14), 2955-2970. doi:10.1017/S0033291716001665
- Auerbach, R. P., Mortier, P., Bruffaerts, R., Alonso, J., Benjet, C., Cuijpers, P.,... Collaborators, W. W.-I. (2018). WHO World Mental Health Surveys International College Student Project: Prevalence and distribution of mental disorders. *J Abnorm Psychol*, 127(7), 623-638. doi:10.1037/abn0000362
- Boerema, A. M., Zoonen, K., Cuijpers, P., Holtmaat, C. J., Mokkink, L. B., Griffiths, K. M., & Kleiboer, A. M. (2016). Psychometric Properties of the Dutch Depression Stigma Scale (DSS) and Associations with Personal and Perceived Stigma in a Depressed and Community Sample. *PLoS One*, 11(8), e0160740. doi:10.1371/journal.pone.0160740
- Burgard, T., Kasten, N., & Bosnjak, M. (2019). *Participation in online surveys in psychology. A meta-analysis*. Paper presented at the Research Synthesis 2019 conference, Dubrovnik, Croatia.
- Busby Grant, J., Bruce, C. P., & Batterham, P. J. (2016). Predictors of personal, perceived and self-stigma towards anxiety and depression. *Epidemiol Psychiatr Sci*, 25(3), 247-254. doi:10.1017/S2045796015000220
- Calear, A. L., Griffiths, K. M., & Christensen, H. (2011). Personal and perceived depression stigma in Australian adolescents: magnitude and predictors. *J Affect Disord*, 129(1-3), 104-108. doi:10.1016/j.jad.2010.08.019
- Corrigan, P. W. (2006). Mental Health Stigma as Social Attribution: Implications for Research Methods and Attitude Change. *Clinical Psychology: Science & Practice*, 7(1), 48-67.
- Fischer, E. H., & Turner, J. L. (1970). Development and Research Utility of an Attitude Scale. *Journal of Consulting and Clinical Psychology*, 35(1), 70-90.
- Gil, I. (2015). Estigma e doença mental. In *Cadernos de Psiquiatria social e cultural* (pp. 59-76).
- Griffiths, K. M., Christensen, H., & Jorm, A. F. (2008). Predictors of depression stigma. *BMC Psychiatry*, 8, 25. doi:10.1186/1471-244X-8-25
- Griffiths, K. M., Christensen, H., Jorm, A. F., Evans, K., & Groves, C. (2004). Effect of Web-Based Depression Literacy and Cognitive-Behavioural Therapy Interventions on Stigmatizing Attitudes to Depression: Randomised Controlled Trial. *The British Journal of Psychiatry*(185), 342-349. doi:10.1192/bjp.185.4.342
- Gulliver, A., Griffiths, K. M., & Christensen, H. (2010). Perceived barriers and facilitators to mental health help-seeking in young people: a systematic review. *BMC Psychiatry*, 10(113).

- Hysenbegasi, A., Hass, S. L., & Rowland, C. R. (2005). The Impact of Depression on the Academic Productivity of University Students. *The Journal of Mental Health Policy and Economics*, 8(3), 145-151.
- Ibrahim, A. K., Kelly, S. J., Adams, C. E., & Glazebrook, C. (2013). A systematic review of studies of depression prevalence in university students. *J Psychiatr Res*, 47(3), 391-400. doi:10.1016/j.jpsychires.2012.11.015
- Khubchandani, J., Brey, R., Kotecki, J., Kleinfelder, J., & Anderson, J. (2016). The Psychometric Properties of PHQ-4 Depression and Anxiety Screening Scale Among College Students. *Archives of Psychiatric Nursing*, 30(4), 457-462.
- Knaak, S., Mantler, E., & Szeto, A. (2017). Mental illness-related stigma in healthcare: Barriers to access and care and evidence-based solutions. *Healthcare Management Forum*, 30(2), 111-116.
- Löwe, B., Wahl, I., Rose, M., Spitzer, C., Glaesmer, H., Wingenfeld, K.,... Brähler, E. (2010). A 4-item measure of depression and anxiety: Validation and standardization of the Patient Health Questionnaire-4 (PHQ-4) in the general population. *Journal of Affective Disorders*, 122, 86-95.
- McNair, B. G., Highet, N. J., Hickie, I. B., & Davenport, T. A. (2002). Exploring the Perspectives of People Whose Lives Have Been Affected by Depression. *The Medical Journal of Australia*, 196(10), 69-76.
- Oliveira, A. R. F., & Azevedo, S. M. (2014). Estigma na doença mental: estudo observacional. *Revista Portuguesa de Medicina Geral e Familiar*, 30(4), 227-234.
- Petkari, E., Masedo Gutierrez, A. I., Xavier, M., & Moreno Kustner, B. (2018). The influence of clerkship on students' stigma towards mental illness: a meta-analysis. *Med Educ*, 52(7), 694-704. doi:10.1111/medu.13548
- Querido, A., Tomás, C., & Carvalho, D. (2016). O estigma face à doença mental nos estudantes de saúde. *Revista Portuguesa de Enfermagem de Saúde Mental*(Spe. 3). doi:10.19131/rpesm.0120
- Sawyer, S. M., Azzopardi, P. S., Wickremarathne, D., & Patton, G. C. (2018). The age of adolescence. *The Lancet Child & Adolescent Health*, 2(3), 223-228. doi:10.1016/s2352-4642(18)30022-1
- Telles-Correia, D., Marques, J. G., Gramaça, J., & Sampaio, D. (2015). Stigma and Attitudes towards Psychiatric Patients in Portuguese Medical Students. *Acta Médica Portuguesa*, 28(6), 715-719.
- Thornicroft, G., Chatterji, S., Evans-Lacko, S., Gruber, M., Sampson, N., Aguilar-Gaxiola, S.,... Kessler, R. C. (2017). Undertreatment of people with major depressive disorder in 21 countries. *Br J Psychiatry*, 210(2), 119-124. doi:10.1192/bjp.bp.116.188078
- Twenge, J. M., & Park, H. (2019). The Decline in Adult Activities Among U.S. Adolescents, 1976-2016. *Child Dev*, 90(2), 638-654. doi:10.1111/cdev.12930
- Uehara, T., Takeuchi, K., Kubota, F., Oshima, K., & Ishikawa, O. (2010). Annual transition of major depressive episode in university students using a structured self-rating questionnaire. *Asia-Pacific Psychiatry*, 2(2), 99-104. doi:10.1111/j.1758-5872.2010.00063.x
- Wilson, C. J., Deane, F. P., Ciarrochi, J., & Rickwood, D. (2005). Measuring Help-Seeking Intentions: Properties of the General Help-Seeking Questionnaire. *Canadian Journal of Counselling*, 39(1), 15-28.

- World Health Organization. (2001). *The WHO World Health Report 2001: New understanding - New hope*. Retrieved from Geneva:
- World Health Organization. (2013). *Mental Health Action Plan 2013-2020*. Retrieved from
- World Health Organization. (2017). *Depression and Other Common Mental Disorders*. Retrieved from
- Xavier, S., Klut, C., Neto, A., Ponte, G. d., & Melo, J. C. (2013). O Estigma da Doença Mental: Que Caminho Percorremos? *Revista do Serviço de Psiquiatria do Hospital Prof. Doutor Fernando Fonseca, EPE, 11(2)*, 10-21.

Table 1: Personal depression stigma as a function of previous experiences with mental health professionals, gender, and PHQ-4 scores.

|                        | Total                                      | Group A<br>(No)                            | Group B<br>(Yes)                           | T-test <sub>(df)</sub>                      |
|------------------------|--------------------------------------------|--------------------------------------------|--------------------------------------------|---------------------------------------------|
| Mean (SD)              | 23.76 (12.37)                              | 25.72 (12.65)                              | 20.88 (11.53)                              | <b>t<sub>(968)</sub>=-6.08, p&lt;0.001</b>  |
| Men:<br>Mean (SD)      | 27.37 (12.90)                              | 28.00 (13.22)                              | 26.11 (12.20)                              | t <sub>(341)</sub> =-1.31, p=0.19           |
| Women:<br>Mean (SD)    | 21.79 (11.63)                              | 24.20 (12.08)                              | 18.78 (10.92)                              | <b>t<sub>(625)</sub>= -5.98, p&lt;0.001</b> |
| t-test <sub>(df)</sub> | <b>t<sub>(968)</sub>=6.88, p&lt;0.001</b>  | <b>t<sub>(577)</sub>= 3.56, p&lt;0.001</b> | <b>t<sub>(392)</sub>= 6.05, p&lt;0.001</b> |                                             |
| PHQ-4 0-5<br>(n=502)   | 23.51 (11.89)                              | 25.11 (12.11)                              | 19.97 (9.98)                               | <b>t<sub>(500)</sub>= -4.92, p&lt;0.001</b> |
| PHQ-4 6-8<br>(n=247)   | 25.91 (13.19)                              | 27.06 (13.44)                              | 23.95 (12.77)                              | t <sub>(245)</sub> = -1.81, p=0.07          |
| PHQ-4 9-12<br>(n=158)  | 21.72 (12.20)                              | 24.68 (13.19)                              | 18.36 (10.31)                              | <b>t<sub>(218)</sub>= -3.93, p&lt;0.001</b> |
| ANOVA <sub>(df)</sub>  | <b>F<sub>(966,2)</sub>=6.86, p&lt;0.01</b> | F <sub>(575,2)</sub> =1.51, p=0.22         | <b>F<sub>(388,2)</sub>=4.20, p&lt;0.01</b> |                                             |

M=mean, SD=standard deviation; df=degrees of freedom. Significant results are in bold.

Table 2: Effects of gender, previous help, mental illness in the family, and PHQ-4 scores on personal depression stigma

|  | $\beta$ | 95% CI | t | p |
|--|---------|--------|---|---|
|--|---------|--------|---|---|

|                                  |      | <b>Model 1</b> |                     |              |                  |
|----------------------------------|------|----------------|---------------------|--------------|------------------|
| Women                            | Ref. |                |                     |              |                  |
| Men                              |      | <b>5.65</b>    | <b>4.07, 7.25</b>   | <b>48.61</b> | <b>&lt;0.001</b> |
|                                  |      | <b>Model 2</b> |                     |              |                  |
| Women                            | Ref. |                |                     |              |                  |
| Men                              |      | <b>5.16</b>    | <b>3.58, 6.73</b>   | <b>41.18</b> | <b>&lt;0.001</b> |
| Previous help - No               | Ref. |                |                     |              |                  |
| Previous help - Yes              |      | <b>-4.35</b>   | <b>-5.89, -2.82</b> | <b>30.88</b> | <b>&lt;0.001</b> |
|                                  |      | <b>Model 3</b> |                     |              |                  |
| Women                            | Ref. |                |                     |              |                  |
| Men                              |      | <b>5.12</b>    | <b>3.54, 6.69</b>   | <b>40.40</b> | <b>&lt;0.001</b> |
| Previous help - No               | Ref. |                |                     |              |                  |
| Previous help - Yes              |      | <b>-4.20</b>   | <b>-5.74, -2.65</b> | <b>20.20</b> | <b>&lt;0.001</b> |
| Family with mental illness - No  | Ref. |                |                     |              |                  |
| Family with mental illness - Yes |      | -1.22          | -2.80, 0.36         | 2.30         | 0.13             |
|                                  |      | <b>Model 4</b> |                     |              |                  |
| Women                            | Ref. |                |                     |              |                  |
| Men                              |      | <b>5.11</b>    | <b>3.54, 6.68</b>   | <b>40.74</b> | <b>&lt;0.001</b> |
| Previous help - No               | Ref. |                |                     |              |                  |
| Previous help - Yes              |      | <b>-4.12</b>   | <b>-5.66, -2.59</b> | <b>27.43</b> | <b>&lt;0.001</b> |
| Family with mental illness - No  | Ref. |                |                     |              |                  |
| Family with mental illness - Yes |      | -1.16          | -2.73, 0.41         | 2.09         | 0.15             |
| PHQ-4 0-5                        |      | 1.02           | -0.86, 2.91         | 1.14         | 0.27             |
| PHQ-4 6-8                        |      | <b>3.65</b>    | <b>1.50, 5.79</b>   | <b>11.04</b> | <b>&lt;0.01</b>  |
| PHQ-4 9-12                       | Ref. |                |                     |              |                  |

β=beta regression coefficients, Ref.=Reference category

\* Model 1= gender; Model 2: Model 1 previous help stigma effect; Model 3: Model 2 plus a family member with mental illness effect; Model 4: Model 3 plus PHQ-4 score effect.

Significant results are in bold.

Table 3: Perceived depression stigma as a function of previous experiences with mental health professionals, gender, and PHQ-4 scores.

|                        | Total                                     | Group A<br>(No)                    | Group B<br>(Yes)                   | t-test <sub>(df)</sub>                   |
|------------------------|-------------------------------------------|------------------------------------|------------------------------------|------------------------------------------|
| Mean (SD)              | 61.66 (17.60)                             | 60.58 (17.34)                      | 62.26 (18.24)                      | <b>t<sub>(968)</sub>=2.32, p&lt;0.05</b> |
| Men:<br>Mean (SD)      | 59.79 (16.17)                             | 58.92 (16.06)                      | 61.57 (16.03)                      | t <sub>(341)</sub> =1.42, p=0.15         |
| Women:<br>Mean (SD)    | 62.68 (18.48)                             | 61.67 (18.07)                      | 63.94 (18.94)                      | t <sub>(625)</sub> = 1.54, p=0.13        |
| t-test <sub>(df)</sub> | <b>t<sub>(968)</sub>=-2.43, p&lt;0.05</b> | t <sub>(577)</sub> = -1.87, p=0.06 | t <sub>(392)</sub> = -1.69, p=0.24 |                                          |
| PHQ-4 0-5<br>(n=502)   | 60.89 (16.80)                             | 60.27 (16.50)                      | 61.91 (17.28)                      | t <sub>(500)</sub> = 1.06, p=0.29        |
| PHQ-4 6-8<br>(n=247)   | 60.99 (18.31)                             | 59.96 (17.90)                      | 62.58 (18.91)                      | t <sub>(245)</sub> = 1.10, p=0.27        |



|                       |                                                   |                              |                              |                            |
|-----------------------|---------------------------------------------------|------------------------------|------------------------------|----------------------------|
| PHQ-4 9-12<br>(n=158) | 64.52 (18.87)                                     | 62.40 (18.71)                | 66.90 (18.86)                | $t_{(218)} = 1.77, p=0.08$ |
| ANOVA <sub>(df)</sub> | <b><math>F_{(966,2)} = 3.53, p&lt;0.05</math></b> | $F_{(575,2)} = 0.78, p=0.46$ | $F_{(388,2)} = 2.68, p=0.07$ |                            |

M=mean, SD=standard deviation; df=degrees of freedom. Significant results are in bold.

Table 4: Effects of gender, previous help, and PHQ-4 scores on personal depression stigma.

|                     | $\beta$      | 95% CI              | t           | p               |
|---------------------|--------------|---------------------|-------------|-----------------|
| <b>Model 1</b>      |              |                     |             |                 |
| Women               | Ref.         |                     |             |                 |
| Men                 | <b>-3.05</b> | <b>-5.38, -0.72</b> | <b>6.59</b> | <b>&lt;0.05</b> |
| <b>Model 2</b>      |              |                     |             |                 |
| Women               | Ref.         |                     |             |                 |
| Men                 | <b>-2.76</b> | <b>-5.09, -0.42</b> | <b>5.36</b> | <b>&lt;0.05</b> |
| Previous help - No  | Ref.         |                     |             |                 |
| Previous help - Yes | <b>2.47</b>  | <b>0.19, 4.74</b>   | <b>4.50</b> | <b>&lt;0.05</b> |
| <b>Model 3</b>      |              |                     |             |                 |
| Women               | Ref.         |                     |             |                 |
| Men                 | <b>-2.67</b> | <b>-5.00, -0.34</b> | <b>5.04</b> | <b>&lt;0.05</b> |
| Previous help - No  | Ref.         |                     |             |                 |
| Previous help - Yes | 2.26         | -0.02, 4.54         | 3.78        | 0.05            |
| PHQ-4 0-5           | <b>-3.29</b> | <b>-6.09, -0.49</b> | <b>5.32</b> | <b>&lt;0.05</b> |
| PHQ-4 6-8           | <b>-3.28</b> | <b>-6.48, -0.08</b> | <b>4.04</b> | <b>&lt;0.05</b> |
| PHQ-4 9-12          | Ref.         |                     |             |                 |

$\beta$ =beta regression coefficients, Ref.=Reference category

\* Model 1= gender; Model 2: Model 1 previous help stigma effect; Model 3: Model 2 plus PHQ-4 score effect.

Significant results are in bold.

Table 5: Help-seeking attitude's differences according to gender, previous help, family mental illness, and PHQ-4 scores.

|                            | M (SD)       | T-test <sub>(df)</sub>                            |
|----------------------------|--------------|---------------------------------------------------|
| Women                      | 17.56 (4.32) | <b><math>t_{(966)} = -5.20, p&lt;0.001</math></b> |
| Men                        | 19.20 (4.90) |                                                   |
| Previous help - No         | 17.69 (4.69) | <b><math>t_{(966)} = 7.66, p&lt;0.001</math></b>  |
| Previous help - Yes        | 20.00 (4.54) |                                                   |
| Family Mental Illness - No | 18.28 (4.80) | <b><math>t_{(966)} = 2.95, p&lt;0.01</math></b>   |
| Family Mental Illness - No | 19.22 (4.80) |                                                   |
| PHQ-4 0-5                  | 18.77 (4.93) | $F_{(966,2)} = 1.61, p=0.20$                      |
| PHQ-4 6-8                  | 18.15 (4.17) |                                                   |
| PHQ-4 9-12                 | 18.79 (4.96) |                                                   |

M=mean, SD=standard deviation; df=degrees of freedom. Significant results are in bold.

- Conceição, V., Rothes, I., Severo, M., Griffiths, K., Hegerl, U., & Gusmão, R. (2020). Depression Stigma Scale in the Portuguese population: psychometric properties and construct validation. doi:<https://doi.org/10.1101/2020.09.14.20194167>
- Eisenberg, D., Downs, M. F., Golberstein, E., & Zivin, K. (2009). Stigma and help seeking for mental health among college students. *Med Care Res Rev*, 66(5), 522-541. doi:10.1177/1077558709335173
- Jennings, K. S., Cheung, J. H., Britt, T. W., Goguen, K. N., Jeffirs, S. M., Peasley, A. L., & Lee, A. C. (2015). How are perceived stigma, self-stigma, and self-reliance related to treatment-seeking? A three-path model. *Psychiatr Rehabil J*, 38(2), 109-116. doi:10.1037/prj0000138
- Pedersen, E. R., & Paves, A. P. (2014). Comparing perceived public stigma and personal stigma of mental health treatment seeking in a young adult sample. *Psychiatry Res*, 219(1), 143-150. doi:10.1016/j.psychres.2014.05.017
- Schnyder, N., Panczak, R., Groth, N., & Schultze-Lutter, F. (2017). Association between mental health-related stigma and active help-seeking: systematic review and meta-analysis. *Br J Psychiatry*, 210(4), 261-268. doi:10.1192/bjp.bp.116.189464
- Wei, Y., McGrath, P. J., Hayden, J., & Kutcher, S. (2015). Mental health literacy measures evaluating knowledge, attitudes and help-seeking: a scoping review. *BMC Psychiatry*, 15, 291. doi:10.1186/s12888-015-0681-9
